# Supplementary material
Source: Springer Nature journal article supplement (https://www.springermedizin.de/resource/supplementary/13058_2013_3362_MOESM4_ESM.pdf/9703952)

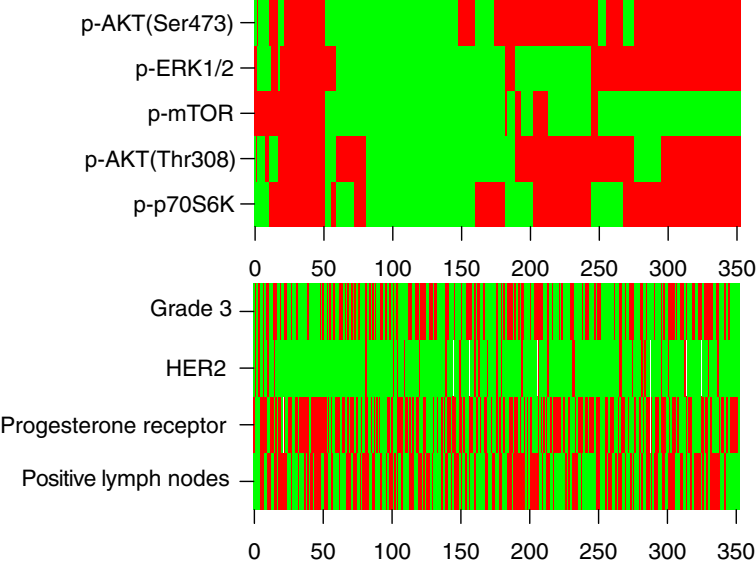

Supplement: MOESM4 [file 9703952]
